# Supplementary material
Source: publisher figshare collection journal article supplement (https://sage.figshare.com/ndownloader/files/18090854)
Supplement: Supplementary file 1 [file 18090854]

## Supplementary Materials

Table S1. Item Descriptions for the CEFSE Measure in Study 1

| CEFSE                                                                                                                     |
|---------------------------------------------------------------------------------------------------------------------------|
| 1. For me, making new friends from other ethnic groups is easy.                                                           |
| 2. I am confident I would be able to get close to a new friend from another ethnic group.                                 |
| 3. I believe I would have fun with a new friend from another ethnic group.                                                |
| 4. <b>I don't think I would be able to make new friends with people from ethnic groups other than my own (reversed).*</b> |
| 5. Being included in a friendship group with young people from lots of other ethnic backgrounds is easy.                  |
| 6. I would find it difficult to get close to a new friend from another ethnic group (reversed).                           |
| 7. I believe I could easily trust a new friend from another ethnic group.                                                 |
| 8. I believe I could find many things in common with new friends from another ethnic group.                               |
| 9. I am sure I could share secrets with a new friend from an ethnic group other than my own.                              |

\*Removed item due to low correlation.

Table S2. Inter-item Correlations for the CEFSE Measure in Study 1

|        | Item 1 | Item 2 | Item 3 | Item 5 | Item 6 | Item 7 | Item 8 | Item 9 |
|--------|--------|--------|--------|--------|--------|--------|--------|--------|
| Item 1 | -      | .68*** | .52*** | .57*** | .49*** | .35*** | .58*** | .54*** |
| Item 2 |        | -      | .62*** | .45*** | .40*** | .29*** | .43*** | .38*** |
| Item 3 |        |        | -      | .62*** | .31**  | .40*** | .61*** | .44*** |
| Item 5 |        |        |        | -      | .33**  | .41*** | .51*** | .43*** |
| Item 6 |        |        |        |        | -      | .30**  | .22*   | .25*   |
| Item 7 |        |        |        |        |        | -      | .55*** | .51*** |
| Item 8 |        |        |        |        |        |        | -      | .50*** |
| Item 9 |        |        |        |        |        |        |        | -      |

*Note.* \*\*\* $p < .001$ , \*\* $p < .01$ , \* $p < .01$ .

Table S3. Item Loadings for the CEFSE Measure in Study 1

|       |           | <b>Item1</b> | <b>Item2</b> | <b>Item3</b> | <b>Item5</b> | <b>Item6</b> | <b>Item7</b> | <b>Item8</b> | <b>Item9</b> |
|-------|-----------|--------------|--------------|--------------|--------------|--------------|--------------|--------------|--------------|
| CEFSE | <i>B</i>  | .72          | .58          | .76          | .74          | .44          | .60          | .74          | .66          |
|       | <i>SE</i> | .06          | .08          | .05          | .06          | .09          | .07          | .06          | .07          |

*Note.* All statistics significant at the <.001 level.

Table S4. Item Descriptions for the Sources of CEFSE Measure in Study 1

| Sources of CEFSE                                                                                                                               |
|------------------------------------------------------------------------------------------------------------------------------------------------|
| 1. Thinking back to primary school, I was good at making close friends from ethnic groups other than my own.                                   |
| 2. <b>Even though I had the chance to make friends from other ethnic groups in the past, I didn't do this (reversed).*</b>                     |
| 3. I am still very close with the friends I made in primary school who belong to ethnic groups other than my own.                              |
| 4. Lots of my friends have close friends who belong to ethnic groups other than their own.                                                     |
| 5. <b>I know few people with friends from other ethnic groups (reversed).*</b>                                                                 |
| 6. My parents have a lot of friends from other ethnic groups.                                                                                  |
| 7. Our teachers in Primary School would encourage us to be friends with people from other ethnic groups.                                       |
| 8. My parents would support me if I wanted to make new friends from other ethnic groups.                                                       |
| 9. If I was starting to form a friendship with someone who belonged to an ethnic group other than my own I would feel nervous.                 |
| 10. If I was starting to form a friendship with someone who belonged to an ethnic group other than my own I would feel comfortable (reversed). |
| 11. I would become anxious if I had to work on a school project with a new friend from another ethnic group.                                   |

*Notes.* Prior contact: Items 1, 2, and 3; Indirect contact: Items 4, 5, and 6; Social norms: Items 7 and 8; Intergroup anxiety: Items 9, 10, and 11.

**\*Removed items due to low reliability.**

Table S5. Inter-item Correlations for the Sources of CEFSE Measure in Study 1

|         | Item 1 | Item 3 | Item 4 | Item 6 | Item 7 | Item 8 | Item 9  | Item 10 | Item 11 |
|---------|--------|--------|--------|--------|--------|--------|---------|---------|---------|
| Item 1  | -      | .46*** | .37*** | .48*** | .26**  | .37*** | -.40*** | -.41*** | -.29**  |
| Item 3  |        | -      | .25*   | .27**  | .13    | .29**  | -.28**  | -.16    | -.13    |
| Item 4  |        |        | -      | .46*** | .13    | .37*** | -.21*   | -.35*** | -.16    |
| Item 6  |        |        |        | -      | .29**  | .25*   | -.22*   | -.36*** | -.11    |
| Item 7  |        |        |        |        | -      | .33**  | -.34*** | -.44*** | -.26**  |
| Item 8  |        |        |        |        |        | -      | -.40*** | -.40*** | -.27**  |
| Item 9  |        |        |        |        |        |        | -       | .56***  | .60***  |
| Item 10 |        |        |        |        |        |        |         | -       | .37***  |
| Item 11 |        |        |        |        |        |        |         |         | -       |

*Note.* \* $p < .05$ , \*\* $p < .01$ , \*\*\* $p < .001$ .

Table S6. Item Loadings for the Sources of CEFSE Measure in Study 1

| Sources            |          | Item1 | Item3 | Item4 | Item6 | Item7 | Item8 | Item9 | Item10 | Item11 |
|--------------------|----------|-------|-------|-------|-------|-------|-------|-------|--------|--------|
| Prior contact      | <i>B</i> | .87   | .53   |       |       |       |       |       |        |        |
|                    | SE       | .09   | .09   |       |       |       |       |       |        |        |
| Indirect contact   | <i>B</i> |       |       | .62   | .74   |       |       |       |        |        |
|                    | SE       |       |       | .09   | .09   |       |       |       |        |        |
| Social norms       | <i>B</i> |       |       |       |       | .53   | .62   |       |        |        |
|                    | SE       |       |       |       |       | .10   | .10   |       |        |        |
| Intergroup anxiety | <i>B</i> |       |       |       |       |       |       | .85   | .68    | .65    |
|                    | SE       |       |       |       |       |       |       | .06   | .08    | .07    |

*Note.* All coefficients are significant at < .001 level.

Table S7. Item Descriptions for the CEFSE Measure in Study 2

| CEFSE                                                                                                                     |
|---------------------------------------------------------------------------------------------------------------------------|
| 1. For me, making new friends from other ethnic groups is easy.                                                           |
| <b>2. I am confident I would be able to get close to a new friend from another ethnic group.*</b>                         |
| 3. I believe I would have fun with a new friend from another ethnic group.                                                |
| <b>4. I don't think I would be able to make new friends with people from ethnic groups other than my own (reversed).*</b> |
| 5. Being included in a friendship group with young people from lots of other ethnic backgrounds is easy.                  |
| <b>6. I would find it difficult to get close to a new friend from another ethnic group (reversed).*</b>                   |
| 7. I believe I could easily trust a new friend from another ethnic group.                                                 |
| 8. I believe I could find many things in common with new friends from another ethnic group.                               |
| 9. I am sure I could share secrets with a new friend from an ethnic group other than my own.                              |

\*Removed items due to low reliability

Table S8. Item Descriptions for the Sources of CEFSE Measure in Study 2

| Sources of CEFSE                                                                                                                                       |
|--------------------------------------------------------------------------------------------------------------------------------------------------------|
| 1. Thinking back to primary school, I was good at making close friends from ethnic groups other than my own.                                           |
| 2. <b>Even though I had the chance to make friends from other ethnic groups in the past, I didn't do this (reversed).*</b>                             |
| 3. I am still very close with the friends I made in primary school who belong to ethnic groups other than my own.                                      |
| 4. Lots of my friends have close friends who belong to ethnic groups other than their own.                                                             |
| 5. <b>I know few people with friends from other ethnic groups (reversed).*</b>                                                                         |
| 6. <b>My parents have a lot of friends from other ethnic groups.*</b>                                                                                  |
| 7. <b>Our teachers in Primary School would encourage us to be friends with people from other ethnic groups.*</b>                                       |
| 8. My parents would support me if I wanted to make new friends from other ethnic groups.                                                               |
| 9. If I was starting to form a friendship with someone who belonged to an ethnic group other than my own I would feel nervous.                         |
| 10. <b>If I was starting to form a friendship with someone who belonged to an ethnic group other than my own I would feel comfortable (reversed).*</b> |
| 11. I would become anxious if I had to work on a school project with a new friend from another ethnic group.                                           |

\*Removed items



## Measures of ethnic background and demographics in Study 1 and 2

First, we would like you to create a participant code using the **last two letters** of your **mother's maiden name** and the **month** you were born in. For example, if your mother's maiden name is Johnson and you were born in May, your participant number could be ON05.

Participant code: .....

### Demographic information

Your age: .....

Month of birth:..... (e.g. September)

Day of birth: .....(e.g. 13<sup>th</sup>)

Your gender:            Male / Female

### **What is an ethnic group?**

An ethnic group can include a person's colour of skin, race and cultural background.

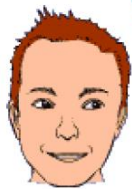

Hi, I'm John. I think of myself as English. I'm White too, so my ethnic/racial background is White English.

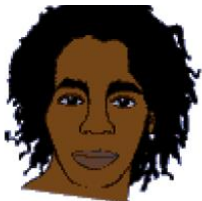

Hiya, my name's Nat. I'm Black Caribbean.

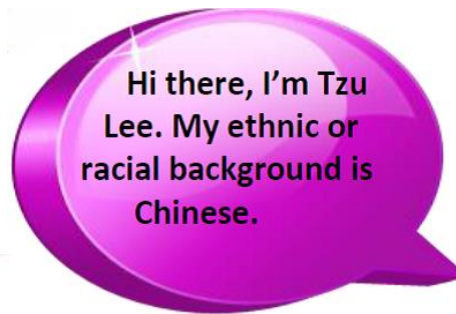

Hi there, I'm Tzu Lee. My ethnic or racial background is Chinese.

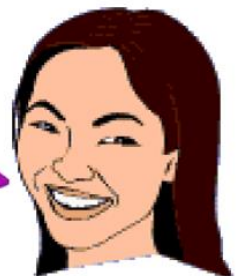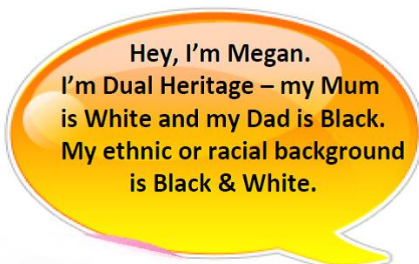

Hey, I'm Megan. I'm Dual Heritage – my Mum is White and my Dad is Black. My ethnic or racial background is Black & White.

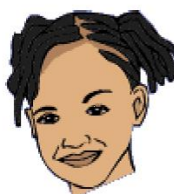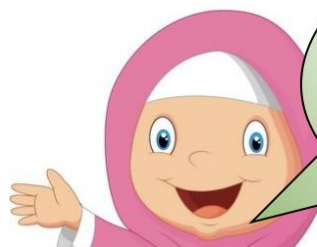

Hey, my name is Fatima and I'm from Lebanon. My racial or ethnic background is Arabic (or Arab).

Now we would like you to tell us about your ethnic background. Your ethnic background can be the same or different to your country of residence or nationality (the country that your passport is issued from). Below we will ask you a few questions about your ethnicity.

Ethnicity:
